# Supplementary material for: Eya4 regulation of Na+/K+-ATPase is required for sensory system development in zebrafish
Source: Oxford University Press journal article supplement (doi:10.1242/dev.012237), 2008-09-18
Supplement: dev012237-tables1.pdf [file dev012237-tables1.pdf]

**Table S1. Otic vesicle hair cell numbers in *eya4* and *atp1b2b* mono-morphants and *eya4-atp1b2b* double morphants**

|                              | MO3eya4 (0.5 ng) | MO1β2b (1.8 ng) | MO3eya4/MO1β2b double | Statistical comparisons ( <i>P</i> ) between MO3eya4/MO1β2b double |               |
|------------------------------|------------------|-----------------|-----------------------|--------------------------------------------------------------------|---------------|
|                              |                  |                 |                       | versus MO3eya4                                                     | versus MO1β2b |
| Number of fish               | 21               | 14              | 17                    |                                                                    |               |
| Hair cells/anterior cristae  | 6.8±0.3          | 6.9±0.5         | 6.6±0.5               | ns (0.79)                                                          | ns (0.64)     |
| Hair cells/lateral cristae   | 6.2±0.3          | 6.9±0.4         | 6.9±0.5               | ns (0.24)                                                          | ns (0.98)     |
| Hair cells/posterior cristae | 6.3±0.5          | 6.1±0.3         | 6.2±0.5               | ns (0.84)                                                          | ns (0.87)     |

ns, not significant.
